# Supplementary material
Source: PubMed Central journal article supplement (PMC2951703)
Supplement: 97320630004473S1.pdf [file 97320630004473S1.pdf]

**Supplementary material:**

$E_{score}$ , is defined by the following energy terms:

$$E_{score} = E_{inter} + E_{intra}$$

Where  $E_{inter}$  is the ligand-protein interaction energy:

$$E_{inter} = \sum_{i \in ligand} \sum_{j \in protein} \left[ E_{PLP}(r_{ij}) + 332.0 \frac{q_i q_j}{4r_{ij}^2} \right]$$

The  $E_{PLP}$  term is a piecewise linear potential. The second term describes the electrostatic interactions between charged atoms.

**Table 1:** The Docking Results

| Name            | Interaction energy between the ligand and protein<br>(Arbitrary unit) | HBond Energy<br>(Arbitrary unit) |
|-----------------|-----------------------------------------------------------------------|----------------------------------|
| Phloretin       | -84.35                                                                | -10.83                           |
| Quercetin       | -83.19                                                                | -5.74                            |
| Chloramphenicol | -73.61                                                                | -4.51                            |
| Naringenin      | -79.19                                                                | -5.55                            |
| Tetracycline    | -106.66                                                               | -0.29                            |
| Pongachalcone I | -69.05                                                                | -3.12                            |
